# Supplementary material
Source: Elsevier journal article supplement (https://www.sciencedirect.com/science/article/pii/S1699258X21001236)

## Supplementary Table. Search strategy

|     | <b>PUBMED</b>                                                                                                                                                                                                                                                                                                                                                                                                                                                                                                                                                                                                                                                                                                                                                                                                                                                                                                                                                                                                                                                                                                                                                                                                                                                                                                                                                                                                                                                                               |         |
|-----|---------------------------------------------------------------------------------------------------------------------------------------------------------------------------------------------------------------------------------------------------------------------------------------------------------------------------------------------------------------------------------------------------------------------------------------------------------------------------------------------------------------------------------------------------------------------------------------------------------------------------------------------------------------------------------------------------------------------------------------------------------------------------------------------------------------------------------------------------------------------------------------------------------------------------------------------------------------------------------------------------------------------------------------------------------------------------------------------------------------------------------------------------------------------------------------------------------------------------------------------------------------------------------------------------------------------------------------------------------------------------------------------------------------------------------------------------------------------------------------------|---------|
| #P1 | "Idiopathic inflammatory myopathy" OR "autoimmune myopathy" OR myositis OR myopathy OR dermatomyositis OR "clinically amyopathic dermatomyositis" OR "amyopathic dermatomyositis" OR "hypomyopathic dermatomyositis" OR "juvenile dermatomyositis" OR "clinically amyopathic juvenile dermatomyositis" OR dermatopolymyositis OR polymyositis OR "immune-mediated necrotizing myopathy" OR "inclusion body myositis" OR "overlap myositis" OR "anti-synthetase syndrome" OR "cancer-associated myositis"                                                                                                                                                                                                                                                                                                                                                                                                                                                                                                                                                                                                                                                                                                                                                                                                                                                                                                                                                                                    | 205200  |
| #P2 | Africa [MeSH] OR Africa [tw] OR Algeria [tw] OR Angola [tw] OR Benin [tw] OR Botswana [tw] OR Burkina Faso[tw] OR Burundi [tw] OR Cameroon [tw] OR Canary Islands [tw] OR Cape Verde [tw] OR Central African Republic [tw] OR Chad [tw] OR Comoros [tw] OR Congo [tw] OR Democratic Republic of Congo [tw] OR Djibouti [tw] OR Egypt [tw] OR Equatorial Guinea [tw] OR Eritrea [tw] OR Ethiopia [tw] OR Gabon [tw] OR Gambia [tw] OR Ghana [tw] OR Guinea [tw] OR Guinea Bissau [tw] OR Ivory Coast [tw] OR Cote d'Ivoire [tw] OR Kenya [tw] OR Lesotho [tw] OR Liberia [tw] OR Libya [tw] OR Libia [tw] OR Madagascar [tw] OR Malawi [tw] OR Mali [tw] OR Mauritania [tw] OR Mauritius [tw] OR Morocco [tw] OR Mozambique [tw] OR Namibia [tw] OR Niger [tw] OR Nigeria [tw] OR Principe [tw] OR Reunion [tw] OR Rwanda [tw] OR Sao Tome [tw] OR Senegal [tw] OR Seychelles [tw] OR Sierra Leone [tw] OR Somalia [tw] OR South Africa [tw] OR St Helena [tw] OR Sudan [tw] OR Swaziland [tw] OR Tanzania [tw] OR Togo [tw] OR Tunisia [tw] OR Uganda [tw] OR Western Sahara [tw] OR Zaire [tw] OR Zambia [tw] OR Zimbabwe [tw] OR Central Africa [tw] OR Central African [tw] OR West Africa [tw] OR West African [tw] OR Western Africa [tw] OR East Africa [tw] OR Eastern African [tw] OR North Africa [tw] OR North African [tw] OR Northern Africa [tw] OR South African [tw] OR Southern Africa [tw] OR Southern African [tw] OR sub Saharan Africa [tw] OR sub Saharan African [tw] | 568425  |
| #P3 | Pregnancy OR pregnant OR gestation                                                                                                                                                                                                                                                                                                                                                                                                                                                                                                                                                                                                                                                                                                                                                                                                                                                                                                                                                                                                                                                                                                                                                                                                                                                                                                                                                                                                                                                          | 1103428 |
| #P4 | #P1 AND #P2 AND #P3                                                                                                                                                                                                                                                                                                                                                                                                                                                                                                                                                                                                                                                                                                                                                                                                                                                                                                                                                                                                                                                                                                                                                                                                                                                                                                                                                                                                                                                                         | 43      |
|     | <b>EMBASE</b>                                                                                                                                                                                                                                                                                                                                                                                                                                                                                                                                                                                                                                                                                                                                                                                                                                                                                                                                                                                                                                                                                                                                                                                                                                                                                                                                                                                                                                                                               |         |
| #E1 | 'idiopathic inflammatory myopathy' OR 'autoimmune myopathy' OR myositis OR myopathy OR dermatomyositis OR 'clinically amyopathic dermatomyositis' OR 'amyopathic dermatomyositis' OR 'hypomyopathic dermatomyositis' OR 'juvenile dermatomyositis' OR 'clinically amyopathic juvenile dermatomyositis' OR dermatopolymyositis OR polymyositis OR 'immune-mediated necrotizing myopathy' OR 'inclusion body myositis' OR 'overlap myositis' OR 'anti-synthetase syndrome' OR 'cancer-associated myositis'                                                                                                                                                                                                                                                                                                                                                                                                                                                                                                                                                                                                                                                                                                                                                                                                                                                                                                                                                                                    | 130625  |
| #E2 | Africa OR Algeria OR Angola OR Benin OR Botswana OR 'Burkina Faso' OR Burundi OR Cameroon OR 'Canary Islands' OR 'Cape Verde' OR 'Central African Republic' OR Chad OR Comoros OR Congo OR 'Democratic Republic of Congo' OR Djibouti OR Egypt OR 'Equatorial Guinea' OR Eritrea OR Ethiopia OR Gabon OR Gambia OR Ghana OR Guinea OR 'Guinea Bissau' OR 'Ivory Coast' OR 'Cote d'Ivoire' OR Kenya OR Lesotho OR Liberia OR Libya OR Libia OR Madagascar OR Malawi OR Mali OR Mauritania OR Mauritius OR Morocco OR Mozambique OR Namibia OR Niger OR Nigeria OR Principe OR Reunion OR Rwanda OR 'Sao Tome' OR Senegal OR Seychelles OR 'Sierra Leone' OR Somalia OR 'South Africa' OR 'St Helena' OR Sudan OR Swaziland OR Tanzania OR Togo OR Tunisia OR Uganda OR 'Western Sahara' OR Zaire OR Zambia OR Zimbabwe                                                                                                                                                                                                                                                                                                                                                                                                                                                                                                                                                                                                                                                                       | 1121376 |
| #E3 | Pregnancy OR Pregnant OR gestation                                                                                                                                                                                                                                                                                                                                                                                                                                                                                                                                                                                                                                                                                                                                                                                                                                                                                                                                                                                                                                                                                                                                                                                                                                                                                                                                                                                                                                                          | 1115891 |
| #E4 | #E1 AND #E2 AND #E3                                                                                                                                                                                                                                                                                                                                                                                                                                                                                                                                                                                                                                                                                                                                                                                                                                                                                                                                                                                                                                                                                                                                                                                                                                                                                                                                                                                                                                                                         | 72      |

## Supplementary Figure : PRISMA flow chart of the study selection

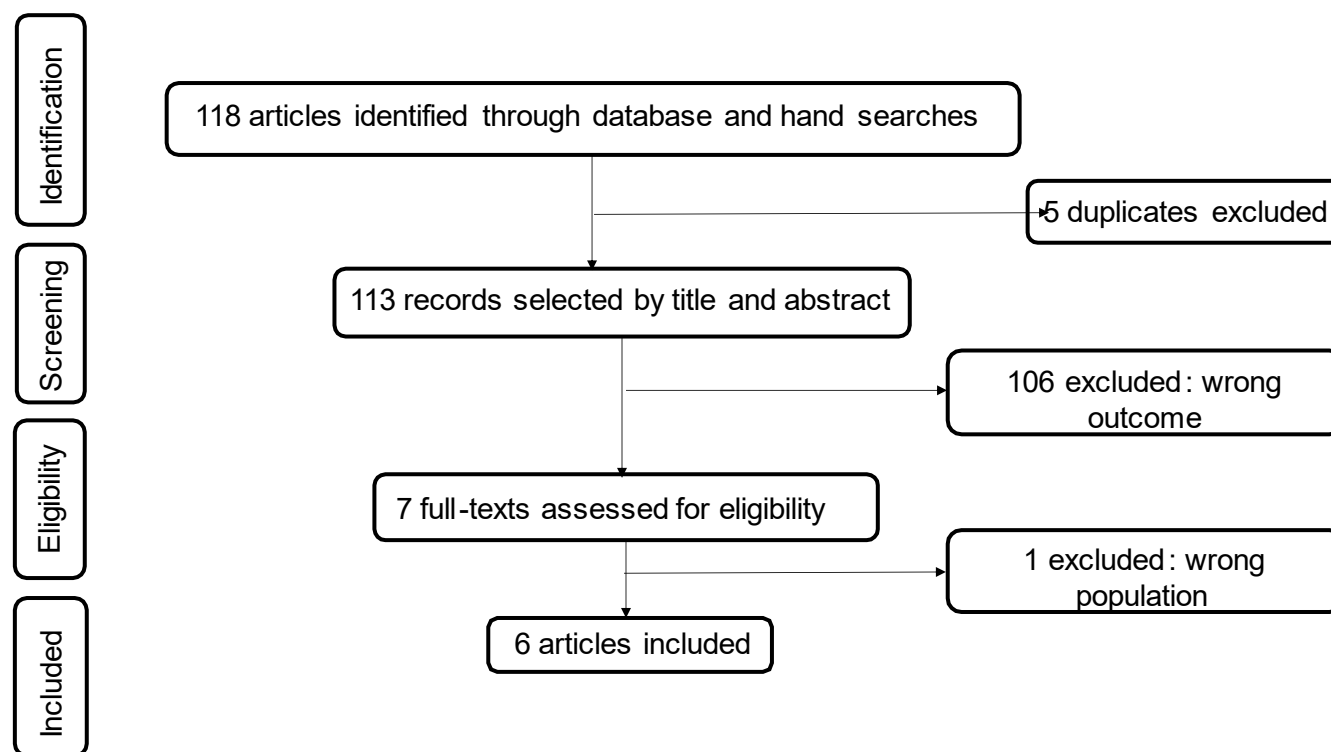

Supplement: mmc1 [file S1699258X21001236:mmc1.pdf]
